# Supplementary material
Source: publisher site journal article supplement (https://www.dovepress.com/article/366423)
Supplement: Supplementary file 1 [file get_supplementary_file.php]

**Supplementary Data**

**Identification of drug combination therapies for SARS-CoV-2: A molecular dynamics simulations approach**

Heba Abdel-Halim1†●, Malak Hajar1†, Luma Hasouneh1†, Suzanne M. A Abdelmalek2†*

**Affiliations:**

1 Department of Medicinal Chemistry, Faculty of Pharmacy and Medical Sciences, University of Petra, Amman, Jordan. ● Dr Abdel-Halim passed away on 14th July 2022.

2 Department of Pharmacology and Biomedical Sciences, Faculty of Pharmacy and Medical Sciences, University of Petra, Amman, Jordan.

†These authors contributed equally to this work.

*Correspondence: Suzanne M. A Abdelmalek

ORCID 0000-0001-5401-6532

Department of Pharmacology and Biomedical Sciences

Faculty of Pharmacy and Medical Sciences

University of Petra

P.O. Box 961343, Amman 11196, Jordan

Tel +962-6-5799555 Ext. (8310)

Fax +962-65715570

E mail [sabdelmalek@uop.edu.jo](mailto:sabdelmalek@uop.edu.jo)

**Supplementary data**

Binding results of docked compounds in the different identified SARS-CoV-2 main protease (Mpro) binding sites, contact frequency analysis, and hydrogen bond interactions reported during the 100ns long MD simulations.


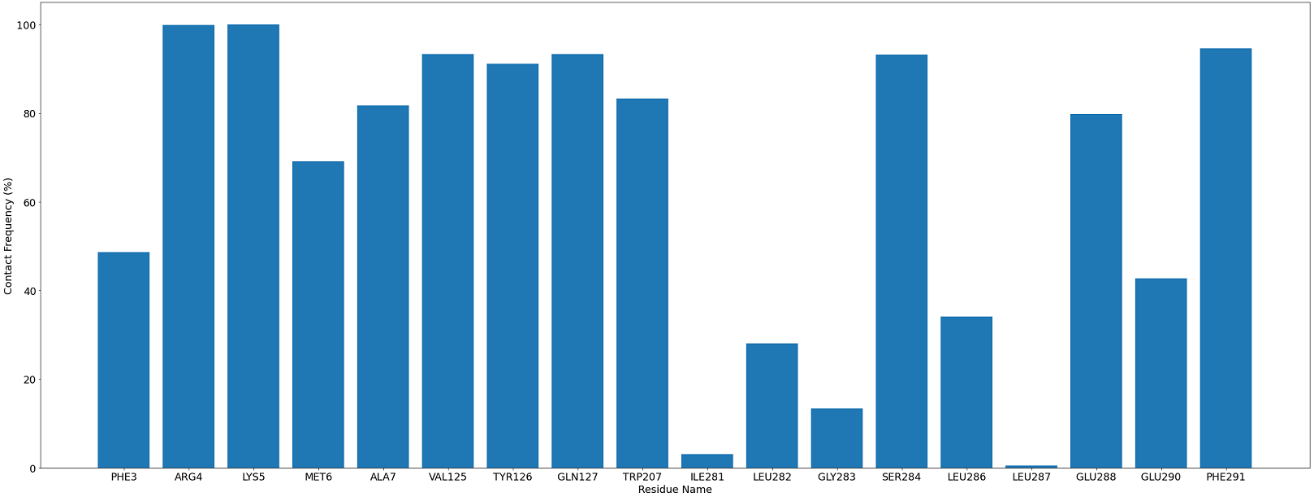

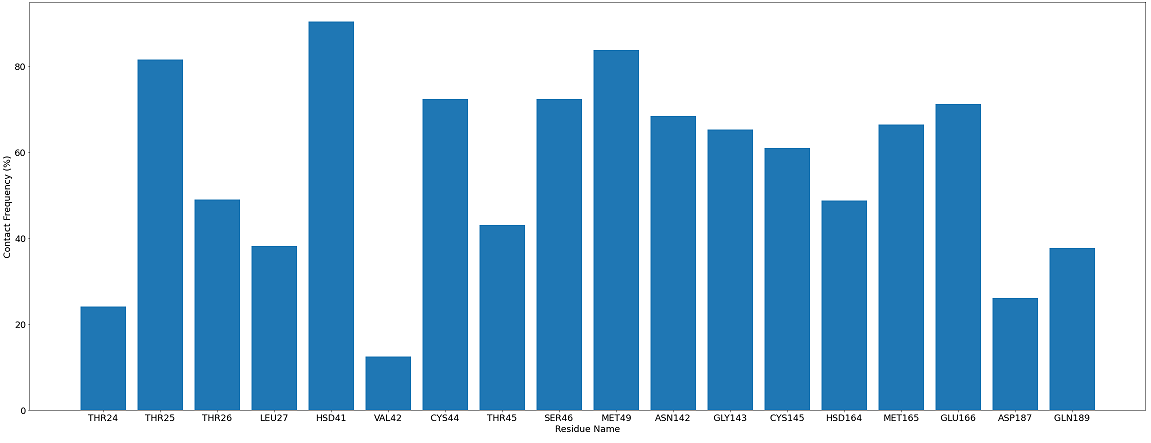


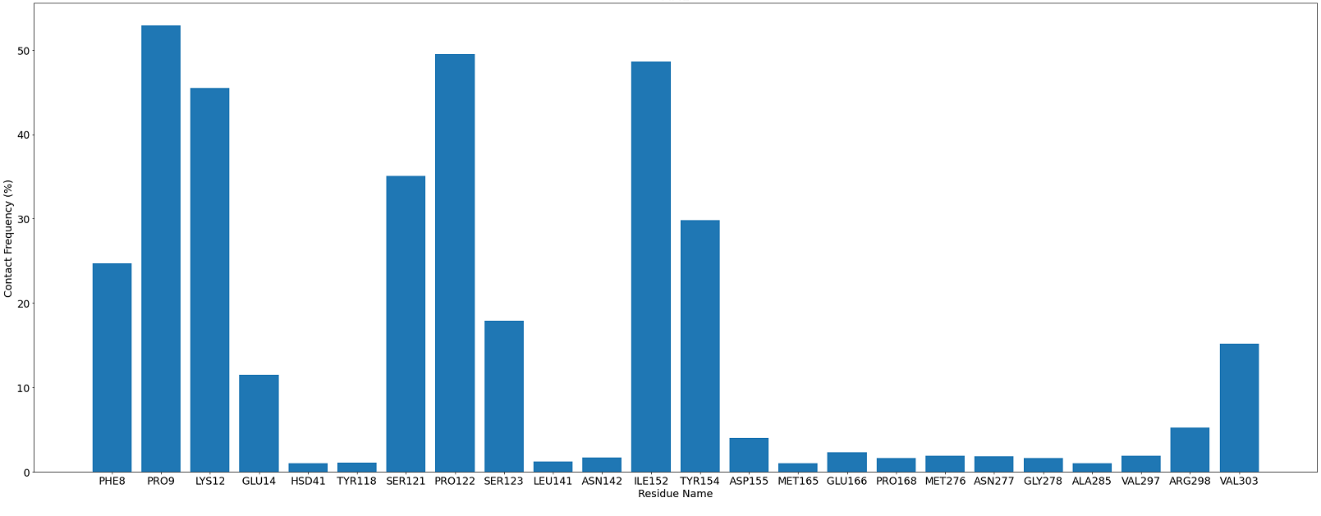
Figure 1S Contact frequency analysis during the 100-ns-long MD simulations for residues belonging to the binding sites defined A: carvedilol in Binding Site 3, B: cefixime in Binding Site 1, and C: favipiravir in In-between Dimer Binding Site of SARS-CoV-2 main protease receptor Mpro.

**B**

**A**

**C**

Table 1S Binding results of different compounds in the different identified SARS-CoV-2 main protease (Mpro) binding sites.

| **Docked Compound** | **Clinical Indication/Use** | **Chemical Class** | **Docking Results** | | | | |
| --- | --- | --- | --- | --- | --- | --- | --- |
| **Binding Site 1** | **Binding Site 2** | **Binding Site 3**  **(Crystal Site)** | **Binding Site 4** | **In-between Dimer**  **Binding Site** |
| Abacavir | Anti-HIV | NRTI | ✓ | ✓ | ✓ |  |  |
| Abemaciclib | Antitumor | Kinase Inhibitor | ✓ |  |  |  |  |
| Acadesine | Anti-Ischemic | Imidazole Ribonucleoside | ✓ | ✓ | ✓ |  | ✓ |
| Acalabrutinib | Anticancer | Tyrosine Kinase Inhibitor | ✓ |  |  |  |  |
| Acebutolol | Antihypertensive | Beta Blocker | ✓ | ✓ | ✓ |  | ✓ |
| Acecarbromal | Hypnotic/Sedative | Ureide | ✓ | ✓ | ✓ |  | ✓ |
| Aceclofenac* | Anti-Inflammatory/ Analgesic | NSAID | ✓ | ✓ | ✓ |  | ✓ |
| Acemetacin* | Anti-Inflammatory/ Analgesic | NSAID | ✓ | ✓ | ✓ |  | ✓ |
| Acenocoumarol | Anticoagulant | Vitamin K Antagonist | ✓ | ✓ | ✓ |  | ✓ |
| Acetaminosalol | Anti-Inflammatory / Analgesic | Salicylate | ✓ | ✓ | ✓ |  | ✓ |
| Acetanilide | Analgesic / Antipyretic | Hydrogen Peroxide Inhibitor | ✓ | ✓ | ✓ |  | ✓ |
| Acetohydroxamic Acid | UTI | Urease Inhibitor | ✓ | ✓ | ✓ |  | ✓ |
| Acetophenazine | Antipsychotic | Phenothiazine | ✓ | ✓ | ✓ |  | ✓ |
| Aspirin* | Anti-Inflammatory / Anti-Platelet | NSAID | ✓ | ✓ | ✓ |  | ✓ |
| Aciclovir | Herpes Treatment | Nucleoside Analog Anti-Viral | ✓ | ✓ | ✓ |  | ✓ |
| Aclarubicin | Anti Cancer (*Investigational*) | Anthracycline Drug | ✓ | ✓ | ✓ |  | ✓ |
| Acrivastine | Allergies / Hay Fever | Antihistamine | ✓ | ✓ | ✓ |  | ✓ |
| Adefovir Dipivoxil | Hepatitis B | Reverse Transcriptase Inhibitors | ✓ | ✓ | ✓ |  | ✓ |
| *Adicillin* | Antibiotic | Beta Lactam Antibiotic |  | ✓ |  |  |  |
| *Adinazolam* | Anxiolytic / Anticonvulsant | Benzodiazepine Derivative | ✓ | ✓ | ✓ |  | ✓ |
| Afatinib | Anticancer | Tyrosine Kinase Inhibitor | ✓ |  |  |  |  |
| Afloqualone | Muscle Relaxant | Beta Blocker |  | ✓ |  |  |  |
| Ajmaline | Antiarrhythmic | Sodium Channel Blocker |  |  | ✓ |  | ✓ |
| Alacepril* | Antihypertensive | ACE Inhibitor |  |  | ✓ |  | ✓ |
| *Alexidine* | Antimicrobial | Biguanide |  |  | ✓ |  | ✓ |
| Alfuzosin | Benign Prostatic Hyperplasia | Alpha-Adrenergic Blocker |  |  | ✓ |  | ✓ |
| Aliskiren | Antihypertensive | Direct Renin Inhibitor |  |  | ✓ |  | ✓ |
| Alizapride | Antiemetic | Dopamine Antagonist |  |  | ✓ |  | ✓ |
| Alkofanone | Antidiarrheal Agent | Dihydrochalcone |  |  | ✓ |  | ✓ |
| Allobarbital | Sedative / Hypnotic | Barbiturate |  |  | ✓ |  | ✓ |
| *Alloclamide* | Cough Suppressant | Benzamide |  |  | ✓ |  | ✓ |
| Allopurinol | Gout | Xanthine Oxidase Enzyme Inhibitor |  |  | ✓ |  | ✓ |
| Almecillin | Antibiotic | Beta Lactam |  | ✓ |  |  |  |
| Alminoprofen* | Anti-Inflammatory / Analgesic | NSAID |  |  | ✓ |  | ✓ |
| Alprazolam | Anxiolytc | Benzodiazepine |  |  | ✓ |  | ✓ |
| Alprenolol | Antihypertensive | Beta Blocker |  |  | ✓ |  | ✓ |
| Altretamine | Antineoplastic | Alkylating Agent |  |  | ✓ |  | ✓ |
| Amantadine | Antiviral | Adamantanes |  |  | ✓ |  | ✓ |
| Amenamevir | Antiviral | Oxadiazolephenyl derivative | ✓ |  |  |  |  |
| Amifampridine | Lambert-Eaton Myasthenic Syndrome | Potassium Channel Blocker | ✓ |  |  |  |  |
| Amikacin | Antibiotic | Aminoglycoside |  |  | ✓ |  | ✓ |
| Amiodarone | Anti-Arrhythmic | Potassium Channel Blocker |  |  | ✓ |  | ✓ |
| Amitriptyline | Antidepressant | Tricyclic Antidepressant‎ |  |  | ✓ |  | ✓ |
| Amitriptylinoxide | Antidepressant | Tricyclic Antidepressant‎ |  |  | ✓ |  | ✓ |
| Apixaban* | Anticoagulant | Factor Xa Inhibitors | ✓ |  |  |  |  |
| Azaribine | Allergy / Common Cold | Antihistamine | ✓ | ✓ | ✓ |  | ✓ |
| Azilsartan Medoxomil* | Antihypertensive | ARB | ✓ |  |  |  |  |
| Baricitinib* | Anti-Inflammatory | Jak1/Jak2 Inhibitor | ✓ |  |  |  |  |
| Benzathine Benzylpenicillin | Antibiotic | Beta Lactam | ✓ |  |  |  |  |
| Betrixaban* | Anticoagulant | Factor Xa Inhibitors | ✓ |  |  |  |  |
| Bictegravir | Anti-HIV | Integrase Inhibitor | ✓ |  |  |  |  |
| Bilastine | Rhinoconjunctivitis | Antihistamine | ✓ |  |  |  |  |
| Brigatinib | Lung Cancer | Kinase Inhibitors | ✓ |  |  |  |  |
| Carbasalate Calcium* | Analgesic, Antipyretic & Anti-Inflammatory | NSAID | ✓ |  |  |  |  |
| Carvedilol | Atrial Fibrillation | Alpha and Beta Blockers |  | ✓ | ✓ |  | ✓ |
| Cefathiamidine | Antibiotic | Cephalosporin | ✓ |  |  |  |  |
| Celiprolol | Antihypertensive | Beta Blocker |  |  |  | ✓ |  |
| Cefixime | Antibiotic | Cephalosporin | ✓ |  |  |  |  |
| Cerivastatin* | Cholesterol Lowering Agent | Statin |  |  |  | ✓ |  |
| Chloramphenicol | Antibiotic | Protein Synthesis Inhibitor | ✓ |  |  |  |  |
| Elvitegravir | Anti-HIV | Integrase Inhibitors | ✓ |  |  |  |  |
| Enasidenib | Acute Myeloid Leukemia | IDH2 Inhibitors | ✓ |  |  |  |  |
| Etimicin | Wide Variety Of Bacterial Infections | Aminoglycosides | ✓ |  |  |  |  |
| Evogliptin | Antidiabetic | Dipeptidyl Peptidase-4 (Dpp-4) Inhibitor | ✓ |  |  |  |  |
| Favipiravir* | Antiviral | Purine nucleic acid analog |  |  |  | ✓ |  |
| Fluorouracil | Anticancer | Antimetabolites | ✓ | ✓ | ✓ |  | ✓ |
| Forodesine | Anticancer | Purine Nucleoside Phosphorylase (PNP) Inhibitor | ✓ |  |  |  |  |
| Icotinib | Antineoplastic | Epidermal Growth Factor Receptor (EGFR) Inhibitor | ✓ |  |  |  |  |
| Imrecoxib | Knee Osteoarthritis (*Investigational*) | Cox-2 Inhibitor | ✓ |  |  |  |  |
| Letermovir | Antiviral | DNA Terminase Complex Inhibitors | ✓ |  |  |  |  |
| Levdobutamine | Heart Failure / Atrial Fibrillation | Β1-Adrenergic Agonist | ✓ | ✓ | ✓ |  | ✓ |
| Levornidazole | Antibiotic | Nitroimidazole | ✓ |  |  |  |  |
| Neratinib | Anticancer | Kinase Inhibitors | ✓ |  |  |  |  |
| Nicardipine | Antihypertensive | Calcium Channel Blocker | ✓ | ✓ | ✓ |  | ✓ |
| Niraparib | Ovarian Cancer | Poly (ADP-Ribose) Polymerase (PARP) Inhibitors | ✓ |  |  |  |  |
| *Olmutinib* | Anticancer | Epidermal Growth Factor Receptor (EGFR) Inhibitor | ✓ |  |  |  |  |
| Pecilocin | Antibiotic | Lincosamides |  | ✓ |  |  |  |
| *Perfosfamide* | Anticancer | Alkylating Agent |  | ✓ |  |  |  |
| Polmacoxib* | Osteoarthritis | NSAIDs | ✓ |  |  |  |  |
| *Pyronaridine* | Antimalarial / Anticancer | Nitroimidazole | ✓ |  |  |  |  |
| Radotinib | Anticancer | Kinase Inhibitor | ✓ |  |  |  |  |
| Ribociclib | Anticancer | Selective Cyclin-Dependent Kinase Inhibitor | ✓ |  |  |  |  |
| Rosoxacin | UTI | Quinolones | ✓ | ✓ | ✓ |  | ✓ |
| Rucaparib | Anticancer | Poly (ADP-Ribose) Polymerase (PARP) Inhibitors | ✓ |  |  |  |  |
| Sulfadiasulfone | Antibacterial | Sulfonamides | ✓ | ✓ | ✓ |  | ✓ |
| Tivozanib | Renal Cell Carcinoma | Kinase Inhibitor | ✓ |  |  |  |  |
| Triaziquone | Anticancer | Alkylating Agent | ✓ |  |  |  |  |
| Xantinol | Cholesterol Lowering Agent | Vasodilator | ✓ |  |  |  |  |
| Zabofloxacin | MDR Infection (Investigational) | Fluroquinolones | ✓ |  |  |  |  |

* Drugs reported in the American Society of Health-System Pharmacists (ASHP) report.1

*Italic* *names* are for compounds under investigation

Table 2S Hydrogen bond interactions reported during the 100ns long MD simulations for carvedilol and Binding Site 3 residues of SARS-CoV-2 main protease receptor Mpro.

| **Donor** | **Acceptor** | **Occupancy** |
| --- | --- | --- |
| Glu166-Main-N | Carvedilol-Side-O2 | 29.33% |
| Carvedilol-Side-N5 | Thr25-Side-OG1 | 4.60% |
| Carvedilol-Side-N5 | Cys44-Main-O | 1.30% |
| Ser46-Side-OG | Carvedilol-Side-O3 | 1.40% |
| Gln189-Side-Ne2 | Carvedilol-Side-O3 | 0.90% |
| Carvedilol-Side-N5 | Thr26-Main-O | 0.40% |
| Gly143-Main-N | Carvedilol-Side-O1 | 0.40% |
| Carvedilol-Side-O2 | Glu166-Side-OE1 | 0.30% |
| Thr25-Side-Og1 | Carvedilol-Side-O4 | 0.30% |
| Gln189-Side-NE2 | Carvedilol-Side-O4 | 0.30% |
| Asn142-Side-ND2 | Carvedilol-Side-N6 | 0.30% |
| Asn142-Side-ND2 | Carvedilol-Side-O2 | 0.30% |
| Carvedilol-Side-N5 | Thr24-Main-O | 0.20% |
| Ser46-Main-N | Carvedilol-Side-O2 | 0.20% |
| Ser46-Side-OG | Carvedilol-Side-O4 | 0.20% |
| Carvedilol-Side-O2 | Gln189-Side-OE1 | 0.20% |
| Asn142-Side-ND2 | Carvedilol-Side-C17 | 0.10% |
| Carvedilol-Side-N5 | Ser46-Side-OG | 0.10% |
| Hsd41-Side-ND1 | Carvedilol-Side-C21 | 0.10% |
| Asn142-Side-ND2 | Carvedilol-Side-O3 | 0.10% |
| Ser46-Side-OG | Carvedilol-Side-N6 | 0.10% |
| Thr24-Side-OG1 | Carvedilol-Side-O1 | 0.10% |

**Table 3S** Hydrogen bond interactions reported during the 100ns long MD simulations for cefixime and Binding Site 1 residues of SARS-CoV-2 main protease receptor Mpro.

| **Donor** | **Acceptor** | **Occupancy** |
| --- | --- | --- |
| Lys5-Side-NZ | Cefixime-Side-O9 | 66.93% |
| Lys5-Main-N | Cefixime-Side-O3 | 39.98% |
| Trp207-Side-NE1 | Cefixime-Side-O5 | 23.35% |
| Cefixime-Side-N14 | Lys5-Main-O | 22.34% |
| Cefixime-Side-N14 | Val125-Main-O | 5.31% |
| Lys5-Main-N | Cefixime-Side-O6 | 2.51% |
| Arg4-Side-NH2 | Cefixime-Side-O6 | 2.40% |
| Cefixime-Side-O8 | Glu290-Side-OE1 | 2.00% |
| Ser284-Side-OG | Cefixime-Side-O5 | 1.70% |
| Lys5-Main-N | Cefixime-Side-O8 | 1.40% |
| Gln127-Side-NE2 | Cefixime-Side-O9 | 0.50% |
| Arg4-Side-Ne | Cefixime-Side-O3 | 0.30% |
| Lys5-Main-N | Cefixime-Side-O9 | 0.20% |
| Gln127-Side-NE2 | Cefixime-Side-O6 | 0.20% |
| Lys5-Side-NZ | Cefixime-Side-N12 | 0.10% |
| Arg4-Side-NE | Cefixime-Side-O6 | 0.10% |
| Lys5-Main-N | Cefixime-Side-O7 | 0.10% |
| Gln127-Main-N | Cefixime-Side-O6 | 0.10% |
| Trp207-Side-NE1 | Cefixime-Side-O4 | 0.10% |

Table 4S. Hydrogen bond interactions reported during the 100-ns-long MD simulations for favipiravir and In-between Dimer site residues of SARS-CoV-2 main protease receptor Mpro.

| **Donor** | **Acceptor** | **Occupancy** |
| --- | --- | --- |
| Lys12-Side-Nz | Favipiravir-Side-O2 | 6.20% |
| Favipiravir-Side-N1 | Val303-Side-OT1 | 1.40% |
| Lys12-Side-Nz | Favipiravir-Side-N2 | 1.20% |
| Favipiravir-Side-N1 | Val303-Side-OT2 | 1.00% |
| Favipiravir-Side-N3 | Glu14-Side-OE1 | 1.00% |
| Favipiravir-Side-N1 | Pro122-Main-O | 0.60% |
| Favipiravir-Side-N1 | Glu166-Side-OE2 | 0.50% |
| Ser123-Side-OG | Favipiravir-Side-N2 | 0.40% |
| Gly278-Main-N | Favipiravir-Side-O1 | 0.30% |
| Favipiravir-Side-N1 | Ser121-Side-OG | 0.30% |
| Favipiravir-Side-N3 | Pro9-Main-O | 0.20% |
| Favipiravir-Side-N3 | Pro122-Main-O | 0.20% |
| Gly143-Main-N | Favipiravir-Side-O2 | 0.20% |
| Favipiravir-Side-N3 | Tyr154-Main-O | 0.10% |
| Favipiravir-Side-N1 | Cys300-Main-O | 0.10% |
| Arg298-Side-NH2 | Favipiravir-Side-O2 | 0.10% |
| Arg298-Side-NE | Favipiravir-Side-N2 | 0.10% |
| Arg298-Side-NE | Favipiravir-Side-O2 | 0.10% |
| Asn142-Side-ND2 | Favipiravir-Side-F1 | 0.10% |
| Favipiravir-Side-N1 | Hsd41-Side-NE2 | 0.10% |
| Favipiravir-Side-N1 | Glu166-Side-OE1 | 0.10% |
| Favipiravir-Side-N1 | Glu166-Main-O | 0.10% |
| Favipiravir-Side-N1 | Asn238-Side-OD1 | 0.10% |
| Favipiravir-Side-N3 | Ala285-Main-O | 0.10% |
| Favipiravir-Side-N1 | Leu272-Main-O | 0.10% |

**Supplementary data references**

1. American Society of Health-System Pharmacists (ASHP). Assessment of Evidence for COVID-19-Related Treatments: Updated 8/19/2021. 2021.
